# Supplementary material
Source: PubMed Central journal article supplement (PMC9472763)
Supplement: jvi.00717-22-s0002.pdf [file jvi.00717-22-s0002.pdf]

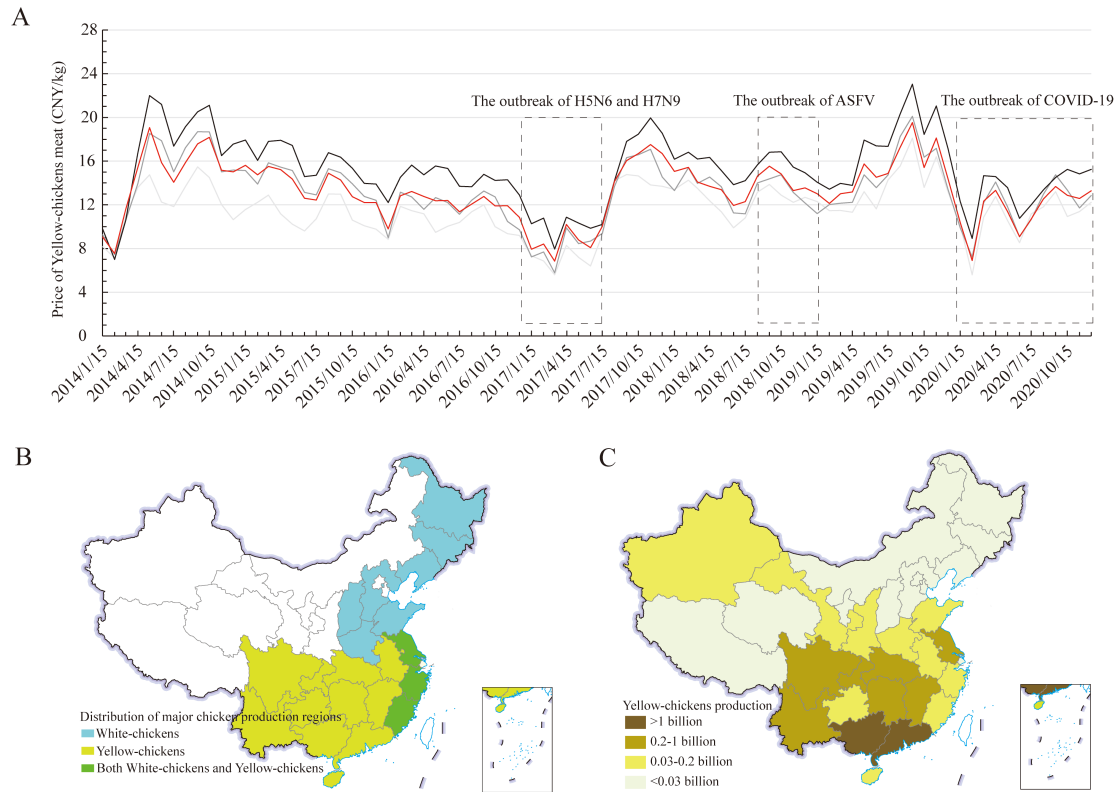

**Figure S1.** Statistics of China's live chicken trade data relevant to this study. A, Statistics of average meat prices of different breeds of Yellow-chickens in China during 2014-2020; “—” represents the meat price of the slaughtered Yellow-chickens of 60-day-old; “—” represents the meat price of the slaughtered Yellow-chickens of 60-90-day-old; “—” represents the meat price of the slaughtered Yellow-chickens of more than 100-day-old. “—” represents the average meat price of all the slaughtered Yellow-chickens; B, Statistics of the major regions of White-chickens and Yellow-chickens production in 2020; C, Statistics of the map of Yellow-chickens production in different regions in 2020.

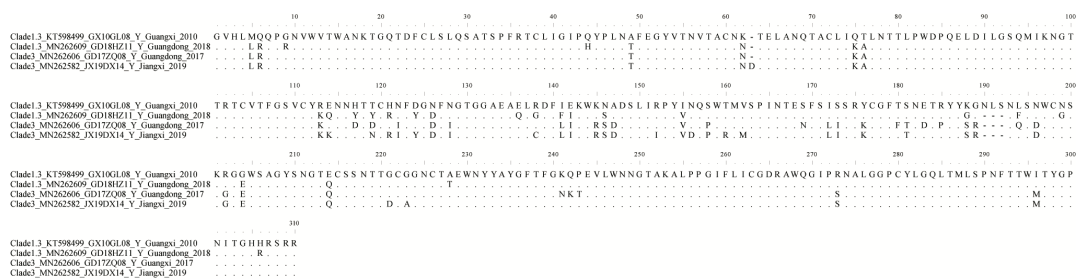

**Figure S2.** Analysis of the aa-site mutations in gp85 of Clades 1.3 and 3. The different aa sites of the prevalent and dominant Clade 1.3 from Yellow-chickens during 2010-2018 and newly generated Clade 3 from Yellow-chickens during 2017-2019 were summarized.

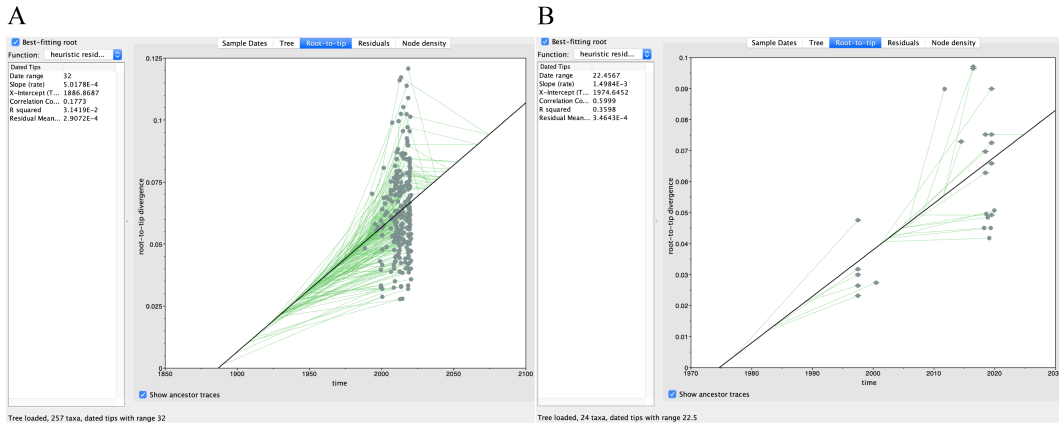

**Figure S3.** Root-to-tip divergence analysis was performed using the ML trees of Clades 1 (A) and 2 (B) separately to plot genetic distances in terms of substitutions per site against the sampling date.

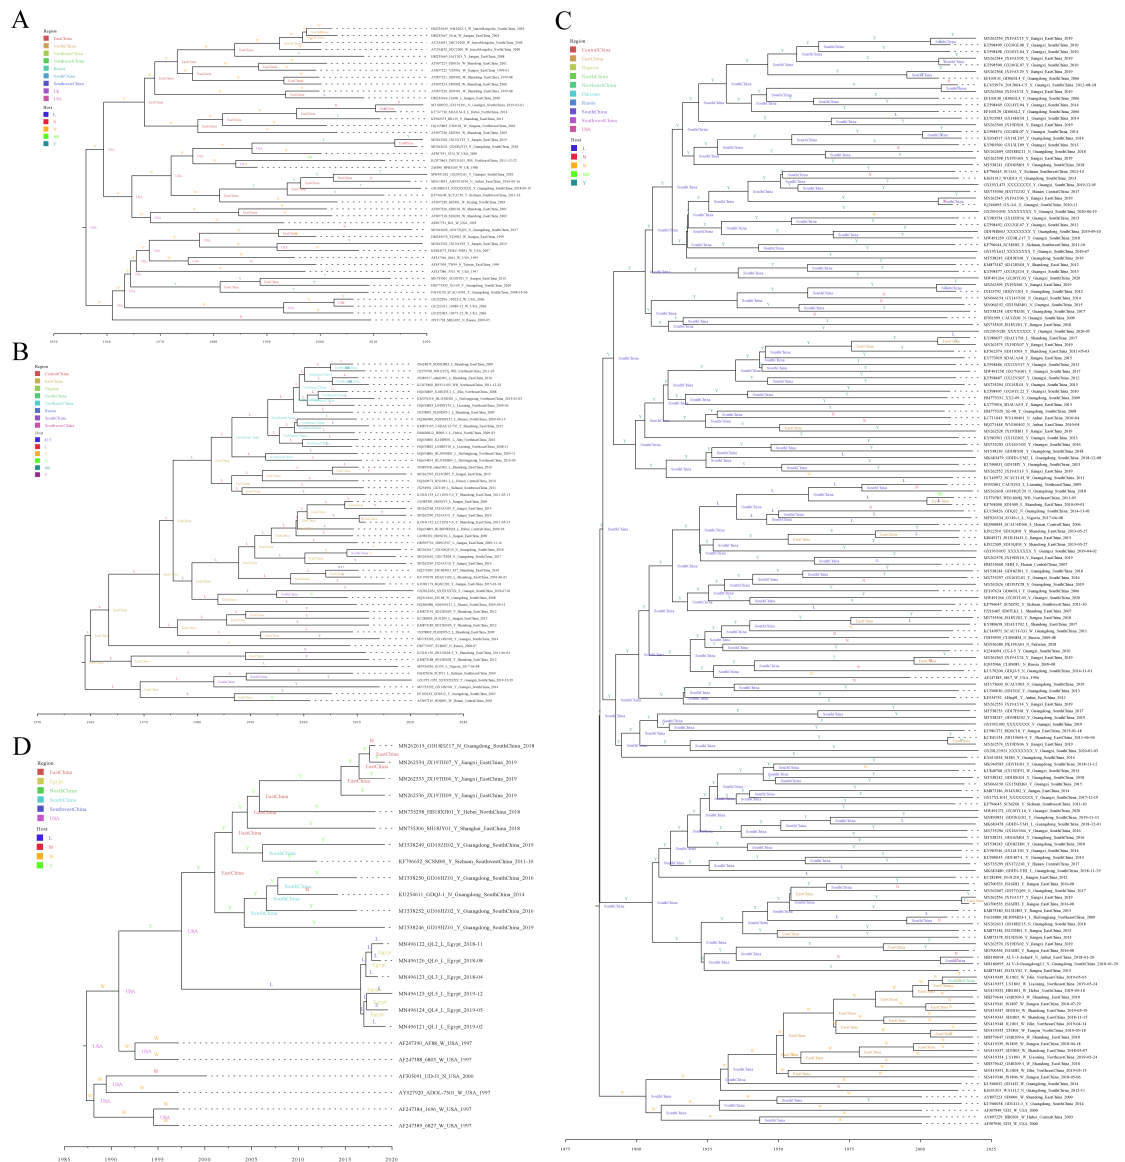

**Figure S4.** Maximum clade credibility (MCC) tree estimated from gp85 gene sequences of Clades 1.1 (A), 1.2 (B), 1.3 (C), and 2 (D), respectively. Nodes are color coded by the most probable geographic source and host of the descendent branches, respectively.
